# Supplementary material for: How Are Non-Medical Settlement Service Organizations Supporting Access to Healthcare and Mental Health Services for Immigrants: A Scoping Review
Source: Int J Environ Res Public Health. 2022 Mar 18;19(6):3616. doi: 10.3390/ijerph19063616 (PMC8956042; doi:10.3390/ijerph19063616)
Supplement: Supplementary file 1 [file ijerph-19-03616-s001.zip › ijerph-1601108-supplementary materials-File S3.xlsx]

## Sheet: Sheet1
Study citation (i.e. Author/ Title/ Year of Publication / Journal/Page Numbers) APA Format	Source origin (i.e. country the study took place in)	Aims/purpose of study (aka study objective)	Which organizations within the health sector or communuity participated in the study? (For example, list the NGOs, Community organizations, health care services that were participating in the study or the type of non-medical organization)	Study population and sample size/study participant description (INCLUDE participant eligibility criteria; participant characteristics; total sample size and size of each group (if applicable))	Methodology (INCLUDE how the author went about doing their research- methodology can be qualitative, quantitative, or mixed methods). (INCLUDE description of methods the author used to gather data (i.e. study design; sampling/recruitment method; data collection method; data analysis method; limitations)).	Intervention type (i.e. describe intervention type briefly and CATEGORIZE INTO which level of the social-ecological model the intervention directed at- i.e. Individual, Relationship, Community, Society)	Concept/ phenomena of interest (i.e. what was the main impact of the intervention that the study was looking at. Provide brief description)	Which outcomes were measured?	Key findings that relate to the research question/ author conclusions (lessons learnt)
Isaacs, Sandra, Valaitis, R., Newbold, B., Black, M., Sargeant, J. (2013). Competence trust among providers as fundamental to a culturally competent primary healthcare system for immigrant families. Primary Health Care Research & Development, 14(1), 80-89.	Canada	Purpose: To explore how an organization’s trust in the cultural competency of other service providers (competence trust) can influence the effectiveness of a services network in meeting the needs of recent immigrant families.	Organizations involved in the study: Public health services, primary care services, immigrant services, family outreach/drop-in services, child and legal services, family counseling services	Study population: community-based organizations providing services to recent immigrant families for an urban community in Atlantic Canada Participant description: organizations included in the case study either provided services to recent immigrants and/or to families with young children living in a neighbourhood with a proportionately high concentration of immigrant residents relative to the res…	Methodology: The case study utilized both social network analysis and qualitative inquiry methodology. Data was collected through an online social network survey and through interviews with key informants.A sociogram was created to display competence trust relationships among the organizations listed in the survey.	Intervention: case study, online network survey and key informant interviews Social-ecological model: Relationship	Concept of interest: focuses on provider perceptions of cultural competency among local service organizations and how this influenced trust and desire to work together for the benefit of families	Outcomes measured: the cultural competency of a service organization refers to its ability and preparedness to work with the unique health related needs of recent immigrant families with young children. For purposes of comparison and measurability, a construct of competence trust was adopted.In this study, competence trust referred to a belief in the other’s cultural competencies when working wit…	Findings: Perceived cultural competency affected the degree of trust and collaboration within the services network when addressing the needs of recent immigrant families. Competence trust toward other providers increased the desire and commitment to work together, while lack of competence trust created avoidance. Non-government organizations were identified among the most culturally competent.Fou…
Isaacs, S., Valaitis, R., Newbold, K. B., Black, M., & Sargeant, J. (2013). Brokering for the primary healthcare needs of recent immigrant families in Atlantic, Canada. Primary Health Care Research & Development, 14(1), 63-79.	Canada	Purpose: describes how broker organizations supported a network of community-based services to work together to address the primary healthcare needs of recent immigrant families with young children	Organizations involved in the study: Organizations were classified under the following service sectors – public health, primary care, immigrant services, family outreach and drop-ins, child and legal services, family counselling, and an ‘other’ category involving services such as housing, food banks, cultural associations, and a public library.	Study population: a network of community-based service organizations providing services to recent immigrant families with young children, newborn to six years of age, living in a geographically bounded neighbourhood of a mid-sized urban centre in Atlantic Canada. Participant description: organizations that support a network of community-based services to work together to address the primary healt…	Methodology: Social network analysis and qualitative inquiry were the methods used within this case study. Sample selection for the study survey followed a whole network approach used in social network analysis. Data collection methods used were (1) an on-line social network survey asking representatives from different organizations about their relationships with other services in the study neigh…	Intervention: Social network analysis and key informant interviews. The social network analysis methods used in this study were largely descriptive, using sociograms (network maps) and tables to display relationships among organizations. Social-ecological model: community	Concept of interest: how a network of community-based services collectively addressed the primary health care (PHC) needs of recent immigrant families with young children and how this was supported by a subset of broker organizations. Broker organizations are organizations that help to move things – information, resources, and people – between and across interorganizational network members. Broke…	Outcomes measured: Network density was calculated as a measure of cohesiveness among network members, that is, how often network members connected with one another in response to different questions. Directed betweenness centrality, also a value calculated for each network member, allowed for the identification of organizations that acted as brokers, linking network members to one another. Direct…	Findings: Cohesiveness of the network was highest when dealing with General Health concerns. A public health programme organization, scored the highest as a network broker when dealing with General Health. An immigrant settlement service appears as the main broker in the regular contact network. Organizations most noted for their engagement in the needs of immigrant families were settlement servi…
Torres, S., Labonté, R., Spitzer, D. L., Andrew, C., & Amaratunga, C. (2014). Improving health equity: the promising role of community health workers in Canada. Healthcare Policy, 10(1), 73-85.	Canada	Purpose: to explore the challenges, successes and unrealized potential of community health workers/multicultural health brokers in facilitating culturally responsive access to healthcare and other social services for new immigrants and refugees	Organizations involved in the study:The Multicultural Health Brokers Co-Operative (hereafter called the Health Co-Op) in Edmonton	Study population: a community-based organization staffed by community health workers/multicultural health brokers (CHWs/MCHBs) serving immigrants and refugees Participant description: The Multicultural Health Brokers Co-Operative (hereafter called the Health Co-Op) and MCHBs in Edmonton fall within an independent CHW program model Sample size: case study of 1	Methodology: The investigation applied an instrumental case study design to examine issues that went beyond the case itself. The case study triangulated multiple research strategies and data sources, including participant and direct observation, in-depth interviews, document review and analysis of policy and other documents and quantitative analysis of the MCHBs’ client caseload database. Data al…	Intervention: case study Social-ecological model: individual, relationship, community	Concept of interest: how the two CHW practice models (independent or integrated) affect their capacity to remove access barriers to health and other services in marginalized communities, or to serve as cultural brokers.	Outcomes measured: The study analyzed two sub-programs of the Health Co-Op as embedded mini-cases: the Perinatal Outreach program, funded by Alberta Health Services (AHS), and the Health for Two program, funded by the Canada Prenatal Nutrition Program and AHS. Finally, the study examined the MCHBs’ practice to understand their role as part of a health human resource workforce that operates indepe…	Findings: The Health Co-Op’s independently run programming has been offering culturally responsive services ever since its founding in 1998. The Health Co-Op’s 54 MCHBs offer an important contribution to public health workforce development and a unique Canadian CHW model. MCHBs provide culturally and linguistically appropriate services to immigrant and refugee families from at least 18 different …
Torres, S., Spitzer, D. L., Labonté, R., Amaratunga, C., & Andrew, C. (2013). Community health workers in Canada: innovative approaches to health promotion outreach and community development among immigrant and refugee populations. The Journal of ambulatory care management, 36(4), 305-318.	Canada	Purpose: discuss CHWs’ roles as part of Canada’s health and human services workforce and showcases a particular Canadian community-based CHW intervention as one effective model that warrants greater integration with, and/or recognition by, the formal health system. The case is the Multicultural Health Brokers Co-op (MCHB Co-op), an independently run health worker cooperative that supports at-risk…	Organizations involved in the study: The Multicultural Health Brokers Co-op (MCHB Co-op), an independently run health worker cooperative that supports at-risk immigrant and refugee women and their families seeking perinatal health and other social services in Edmonton	Study population: MCHB Participant description: MCHB Co-op undertakes its outreach through Multicultural Health Brokers (Health Brokers). Health Brokers support actions related to social determinants of health, such as lack of housing, food insecurity, and isolation. They undertake community development initiatives to maximize the long-term possibilities for positive outcomes for the health and w…	Methodology: case study investigation that featured the MCHB Co-op, the Health Brokers practice, and 2 MCHB Coop programs that were regarded as embedded mini-cases: the Perinatal Outreach and Support (funded by the AHS) and Health for Two (funded by the Canada Prenatal Nutrition Program and the AHS). The case study was conducted over an 18-month period, followed by data validation sessions to cor…	Intervention: two MCHB Coop programs Social-ecological model level: Individual, Relationship, Community, Society	Concept of interest: study was designed to better comprehend the modus operandi of the MCHB Coop model in order to understand its functioning and programming and the Health Brokers practice in health promotion outreach to immigrant and refugee communities.	Outcomes measured: (a) articulating, reflecting on, and monitoring the Health Brokers practice; (b) enhancing the capacity of the organization; (c) developing a market niche; and (d) seeking intersectoral, cross-governmental collaboration.	Findings: The first element is how the Health Brokers practice is articulated and monitored. The MCHB Co-op and Health Brokers provide service delivery and community capacity building through at least 9 programs to more than 2300 immigrant and refugee families. Their practice is guided through a health promotion empowerment approach adopted from Labonte (1993). Labonte’s (1993) approach includes …
Chadwick, K. A., & Collins, P. A. (2015). Examining the relationship between social support availability, urban center size, and self-perceived mental health of recent immigrants to Canada: A mixed-methods analysis. Social Science & Medicine, 128, 220-230.	Canada	Purpose: examine the relationship between self-perceived mental health (SPMH), social support availability, and urban center size, for recent immigrants to Canada.	Organizations invovled in the study: settlement service organizations (SSOs)	Study population: For the quantitative component: Recent immigrant respondents (0-9 years of residency) and those living in either large or small urban centers were chosen as the sample population for this study; for the qualitative component: study population was managers or coordinators working at SSOs located in three large and three small urban centers in Canada.Using the 2011 Census populati…	Methodology: explanatory mixed-methods design; quantitative component involved statistical analysis of 2009-2010 Canadian Community Health Survey data, selecting for only recent immigrants and for those living in either large or small urban centers. The qualitative component involved in-depth interviews with managers of settlement service organizations located in three large and three small urban…	Intervention type: the CCHS survey analysis and in-depth interviews Social-ecological level: individual, relationship, community	Concept of interest: social support availability is positively associated with higher SPMH status, and is higher in small urban centers.	Outcomes measured: Self-perceived mental health (SPMH) was the primary outcome measure.The statistical analysis was meant to assess the relationship between SPMH and urban center size, social support availability, and demographic covariates	Findings/Conclusions: quantitative analyses demonstrated that low levels of social support were significantly associated with low SPMH among recent Canadian immigrants. Interviewees corroborated these findings by confirming that social support was an important factor in the successful settlement of their immigrant clientele, which likely impacts on their mental health status.Our quantitative anal…
Cheng, I., McBride, J., Decker, M., Watson, T., Jakubenko, H., & Russo, A. (2019). The Asylum Seeker Integrated Healthcare Pathway: a collaborative approach to improving access to primary health care in South Eastern Melbourne, Victoria, Australia. Australian journal of primary health, 25, 6-12.	Australia	Purpose: South Eastern Melbourne Medicare Local, Monash Health, the Australian Red Cross and local settlement support agencies collaborated to develop an integrated healthcare pathway in South Eastern Melbourne to facilitate healthcare access for asylum seekers released from detention.The aim of this article is to describe The Asylum Seeker Integrated Healthcare Pathway and present the evaluation…	Organizations involved in the study: South Eastern Melbourne Medicare Local, Monash Health, the Australian Red Cross and local settlement support agencies	Study population: asylum seekers newly released from detention into South Eastern Melbourne Participant description: Most of the referred clients, 93%, were men, and 54% were aged between 22 and 34 years. Afghanistan was the leading country of origin, with 30.4% of clients from this region, followed by Sri Lanka (25.3%) and Iran (19.2%), Pakistan (10.7%), Other (6%), Stateless (3.7%), Vietnam (3.…	Methodology: a) Pre-session coordination: The Department of Immigration and Citizenship informed the Australian Red Cross and settlement support agencies of the expected numbers of asylum seekers being moved into South Eastern Melbourne. This information was then passed on to all participating agencies (South Eastern Melbourne Medicare Local, Monash Health Refugee Health and Wellbeing), who alloc…	Intervention type: This partnership of key local stakeholders aimed to develop The Aslyum Seeker Integrated Healthcare Pathway: an innovative, sustainable, integrated healthcare pathway to facilitate timely access to appropriate health services for all asylum seekers newly released from detention into South Eastern Melbourne Social-ecological model level: Relationship, Community	Concept of interest:The Asylum Seeker Integrated Healthcare Pathway utlization	Outcomes measured: The Asylum Seeker Integrated Healthcare Pathway was evaluated to capture the processes and outcomes associated with the initiative. Practical considerations, such as time and resource availability, strongly influenced the evaluation methods selected.Presenting health issues identified through the screening process and triage outcomes were also recorded and analysed to assess th…	Findings: Almost half of the clients (48.5%) were identified as having incomplete immunisations, and this was the most frequently presenting health issue. Almost one-quarter of clients (23.5%) presented with dental-related concerns, and 15% presented with mental health issues.Seven hundred and forty-one (78%) clients who were screened and assessed by the refugee health nurses were provided with a…
Frost, E. L., Markham, C., Springer, A. (2018). Refugee health education:evaluating a community-based approach to empowering refugee women in Houston, Texas. Advances in social work, 18 (3), 949-964.	United States	Purpose: In Houston, resettlement agencies assist in connecting refugees to various services including food stamps and health insurance, as well as English as a second language (E.S.L.) classes, job development, and linkage to health clinics. Despite local services offered by resettlement agencies, refugees are less likely to access health and social services due to low health literacy, inability…	Organizations invovled in the study: local refugee resettlement agency, University of Texas Health Science Centre	Study population: The priority population of the pilot intervention was Burmese-speaking refugee women enrolled in services at the local resettlement agency in Houston Texas. Since participation in health education interventions is typically low in minority populations, and given the pilot nature of this intervention, there were no restrictions on ethnicity. Participant description: Key health is…	Methodology: In responding to the public health needs of the local Burmese refugee community in Houston, Texas, a pilot community-based health education intervention, titled Refugee Women’s Health Initiative, was developed in partnership with a local refugee resettlement agency and implemented by two students from The University of Texas Health Science Center in Houston (UTHealth). Focusing on Bu…	Intervention type: pilot community-based health education intervention, titled Refugee Women’s Health Initiative; intervention included workshops, Q&A sessions with health professionals; and excursions. Social-ecological model level: individual	Concept of interest: This study was a process evaluation of the Refugee Women’s Health Initiative that had the following objectives: 1) To assess the feasibility, acceptability, and initial impact on health knowledge and self-efficacy of the refugee women and resettlement agency staff, 2) To understand process-related aspects of the intervention including knowledge, perceived benefits and impleme…	Outcomes measured: Four prominent themes were drawn from the interviews with the refugee women: 1) Perceived benefit of participating, 2) Opportunities to practice English, 3) Community as a cultural value, and 4) Family as a cultural value.	Findings: For the women attending the intervention, there was a perceived benefit in learning new information that was relevant and useful to their everyday lives. Women felt empowered when learning new skills; empowerment was noted when the women learned a skill that was beneficial in being able to navigate and manage life in the U.S. Knowledge gained on various health topics and the opportunity…
McMurray, J., Breward, K., Breward, M., Alder, R., Arya, N. (2014). Integrated Primary Care Improves Access to Healthcare for Newly Arrived Refugees in Canada. Journal of Immigrant Minority Health, 16, 576-585.	Canada	Purpose: quantify the impact a dedicated refugee health clinic, in partnership with workers at the local receiving centre called Reception House, has on GAR’s access to services such as wait times for physician and specialist care, access to allied health services and physician specialists, familiarity with the healthcare system, and social constructs such as perceived family well-being.	Organizations involved in the study: dedicated refugee health clinic, in partnership with workers at the local receiving centre called Reception House	Study population: government assisted refugees at Reception House Participant description: GARs that received settlement assistance from Reception House before and after the establishment of the dedicated refugee clinic. Using administrative records, outcomes were anlayzed for refugees arriving 18 months prior to the introduction of the clinic and compared with those of refugees arriving in the 1…	Methodology: This study used a before and after, repeated survey study design comparing outcomes for GARs that received settlement assistance from Reception House before and after the establishment of the dedicated refugee clinic. Using administrative records, outcomes were anlayzed for refugees arriving 18 months prior to the introduction of the clinic and compared with those of refugees arrivin…	Intervention type: The refugee health clinic model relies heavily on several of these integrating mechanisms to deliver responsive, culturally appropriate primary care, including an uncharacteristically close relationship with Reception House and its staff, partnerships between Reception House case workers and health professionals, translation services, comprehensive assessments, and internationa…	Concept of interest: impact of a partnership between a dedicated health clinic for government assisted refugees (GARs), a local reception centre and community providers, on wait times and referrals.	Outcomes measured: The dependent variables focus on outcomes that reflect the stated goals of the healthcare system in Ontario. Of note, in 2012 the quasi-autonomous organization responsible for healthcare quality in Ontario expressed a desire for improvement in wait times to see providers, and avoidance of hospitalization. Furthermore, they attributed accessibility, patient-centredness (providin…	Findings: A total of 872 records were examined, including 444 males (50.9 %) and 428 females (49.1 %). A large percentage were under the age of 18 (49.2 %). Thirty-eight different countries of birth were documented, and over 40 countries were listed as the country of last residence. Although statistically significant, the differences in country of origin and residence in the before and after samp…
Salami, B., Salma, J., & Hegadoren, K. (2019). Access and utilization of mental health services for immigrants and refugees: Perspectives of immigrant service providers. International Journal of Mental Health Nursing, 28, 152-161.	Canada	Purpose: focuses on immigrant service providers’ perceptions of access to and use of mental health services for immigrants and refugees in Alberta.	Organizations involved in the study: immigrant serving agencies in Alberta.	Study population: This study focuses on immigrant service providers’ perceptions of access to and use of mental health services for immigrants and refugees in Alberta. Participants were recruited from immigrant serving agencies in the province of Alberta, Canada. Immigrant serving agencies are nonprofit, community-based, and provide settlement, integration, and adaptation services to immigrants w…	Methodology: A qualitative descriptive design was used to collect and analyse the perspectives of 53 immigrant service providers recruited from nine immigrant serving agencies in Alberta between November 2016 and January 2017. Data were collected using a combination of individual interviews and focus groups, followed by thematic data analysis to identify relevant themes.	Intervention type: qualitative descriptive design Social-ecological model level: individual	Concept of interest: perceptions of access to and use of mental health services for immigrants and refugees	Outcomes measured: Barriers to access and use of mental health services; and strategies to improve mental health service delivery	Findings: Two major insights that come from the findings are, first, that ISPs are at the front lines of initiating conversations about mental health in immigrant communities and provide multiple supports for mental well-being. Participants frequently supported clients who were experiencing a crisis; something that could be better addressed by developing proactive initiatives to raise awareness, …
Koehn, S. D., Donahue, M., Feldman, F., & Drummond, N. (2019). Fostering trust and sharing responsibility to increase access to dementia care for immigrant older adults. Ethnicity & health, DOI: 10.1080/13557858.2019.1655529	Canada	Purpose: explores the role of immigrant-serving agencies in facilitating access to dementia services and supports provided by dementia service agencies (particularly the health authority and local chapters of the Alzheimer Society) through their propensity to develop trusting relationships between staff and clients.	Organizations involved in the study: Immigrant-service (IS) agencies	Study population/participant description/sample size: Data are drawn from interviews with 15 dyads of persons with dementia and their family caregivers (10 Punjabi, 5 Korean), six focus groups in the Punjabi and Korean-speaking communities (one focus group with each of 8–10 older men, older women, and mixed gender working age adults in each community). We also interviewed 20 managerial and frontl…	Methodology: Our research is a qualitative case study of Punjabi and Korean speakers living in the Lower Mainland of BC, Canada.	Intervention type: The interviews explored understanding and experiences of dementia and access to dementia diagnosis and care in relation to dimensions of Candidacy. Social-ecological model level: relationship	Concept of interest: access to dementia diagnosis and care	Outcomes measured: findings were presented in relation to five of the seven dimensions of Candidacy: (1) identification, (2) navigation, (3) offers and resistance, (4) service permeability, and (5) local operating conditions.	Findings: Trust of community, including care partners in IS agencies: Participants in each of the focus groups with older adults attested to the importance of IS agencies for connecting them with peers and community resources and health information, including dementia. Overall, interviews with DS and IS staff revealed that while both the Alzheimer Society and health authority were familiar with e…
NOTE: study citation 3 and 4 are from the same reseach, different measures and aims; study citation 5 and 6 are from the same research, different aims.
